# Supplementary material for: Food Insecurity Associated with the Quality of Life of Older People
Source: Research Square preprint supplement (doi:10.21203/rs.3.rs-6178619/v1), 2025-03-17
Supplement: Supplementary file 1 [file f0c437e3976c20a01bbd73ba.docx]

**Food Insecurity Associated with the Quality of Life of Older People**

**Supplementary material.**

**Supplementary Table 1.** Quality of Life Associated with the Sociodemographic Characteristics of the Older Population

|  |  | Low quality of life | | High quality of life | |  |  |
| --- | --- | --- | --- | --- | --- | --- | --- |
|  | Frequency | Percentage | Frequency | Percentage | Chi-squared | *P* |
| Marital status | Single/widowed | 292 | 14.4 | 362 | 17.4 | 0.61 | 0.893 |
| Married/common-law union | 616 | 30.3 | 761 | 37.6 |  |  |
| Education | <6 years | 893 | 98.3 | 1076 | 95.8 | 10.8 | 0.001 |
| >7 years | 15 | 1.7 | 47 | 4.2 |  |  |
| Sources of economic income | Still working | 128 | 6.3 | 275 | 13.5 | 43.7 | 0.0001 |
| Spousal support | 72 | 3.5 | 102 | 5 |  |  |
| Retirement pension | 59 | 2.9 | 75 | 3.7 |  |  |
| Disability pension | 14 | 0.7 | 18 | 0.9 |  |  |
| Family support | 458 | 22.6 | 435 | 21.4 |  |  |
| Others | 177 | 8.7 | 218 | 10.7 |  |  |
| Occupation | Formal employee/retired/  merchant/farmer/laborer | 138 | 6.8 | 332 | 16.4 | 58.7 | 0.0001 |
| Unemployed/housewife | 770 | 37.9 | 791 | 38.9 |  |  |
| Medical service | None | 75 | 3.7 | 71 | 3.5 | 2.5 | 0.093 |
| Public health | 831 | 40.9 | 1036 | 51 |  |  |
| Private | 2 | 0.1 | 16 | 0.8 |  |  |
| Health problems | None | 4 | 0.2 | 12 | 0.6 | 2.5 | 0.11 |
| Type 2 diabetes mellitus | 240 | 11.8 | 272 | 13.3 |  |  |
| High blood pressure | 436 | 21.5 | 604 | 29.7 |  |  |
| Respiratory diseases | 171 | 8.4 | 153 | 7.5 |  |  |
| Heart disease | 54 | 2.7 | 83 | 4.1 |  |  |
| Dental | 2 | 0.1 | 0 | 0 |  |  |
| Type of disability | Visual | 259 | 12.8 | 368 | 18.1 | 82.4 | 0.001 |
| Auditive | 188 | 9.3 | 186 | 9.2 |  |  |
| Mental | 32 | 1.6 | 18 | 0.9 |  |  |
| Motorboat | 133 | 6.5 | 73 | 3.6 |  |  |
| Speech | 8 | 0.4 | 3 | 0.1 |  |  |
| None | 218 | 10.7 | 413 | 20.3 |  |  |
| Not known | 67 | 3.3 | 60 | 3 |  |  |
| Motor and auditory | 1 | 0 | 0 | 0 |  |  |
| Visual and auditory | 2 | 0.1 | 2 | 0.1 |  |  |

**Supplementary Table 2.** Quality of Life Associated with the Housing Conditions of the Older Population

|  | | Low quality of life | | High quality of life | |  |  |  |  |  |
| --- | --- | --- | --- | --- | --- | --- | --- | --- | --- | --- |
|  |  | *n* | % | *n* | % | x2 | *P* | OR | 5% CI | 95% CI |
| Floor | Earth | 63 | 6.9 | 90 | 8 | 0.83 | 0.3 |  |  |  |
| Cement | 845 | 93.1 | 1033 | 92 |  |  |  |  |  |
| Walls | Foil, cardboard | 44 | 4.8 | 65 | 5.8 | 0.87 | 0.3 |  |  |  |
| Concrete, brick, or stone | 864 | 95.2 | 1058 | 94 |  |  |  |  |  |
| Roof | Reed or sheet | 267 | 29.4 | 234 | 20.8 | 19.83 | 0.0001 | 1.582 | 1.29 | 1.93 |
| Tile, slab | 641 | 70.6 | 889 | 79.2 |  |  |  |  |  |
| Electrical energy | No | 38 | 4.2 | 20 | 1.8 | 10.45 | 0.001 | 2.4 | 1.39 | 4.17 |
| Yes | 870 | 95.8 | 1103 | 98.2 |  |  |  |  |  |
| Drinking water | No drinking water | 74 | 8 | 56 | 5 | 8.38 | 0.004 | 1.69 | 1.181 | 2.420 |
| With drinking water | 834 | 91.9 | 1067 | 95 |  |  |  |  |  |
| Stove | Firewood | 151 | 16.6 | 120 | 10.7 | 15.34 | 0.001 | 1.67 | 1.29 | 2.16 |
| Natural gas or butane | 757 | 83.4 | 1003 | 89.3 |  |  |  |  |  |
| Drainage | No | 632 | 69.6 | 885 | 78.8 | 22.49 | 0.001 | 1.26 | 1.14 | 1.4 |
| Yes | 276 | 30.4 | 238 | 21.2 |  |  |  |  |  |
| Full bathroom w/shower | No | 442 | 48.7 | 635 | 56.5 | 12.47 | 0.001 | 1.15 | 1.06 | 1.25 |
| Yes | 466 | 51.3 | 488 | 43.5 |  |  |  |  |  |
| Internet at home | No | 31 | 3.4 | 48 | 4.3 | 1.003 | 0.31 |  |  |  |
| Yes | 877 | 96.6 | 1075 | 95.7 |  |  |  |  |  |
| Cell phone | No | 150 | 16.5 | 291 | 25.9 | 26.05 | 0.001 | 1.26 | 1.16 | 1.37 |
| Yes | 758 | 83.5 | 832 | 74.1 |  |  |  |  |  |
| Home phone | No | 236 | 26 | 341 | 30 | 4.72 | 0.03 | 1.01 | 1.01 | 1.19 |
| Yes | 672 | 74 | 782 | 69.4 |  |  |  |  |  |
| Automobiles for personal use | No | 110 | 12.1 | 192 | 17.1 | 9.84 | 0.002 | 1.18 | 1.07 | 1.3 |
| Yes | 798 | 87.9 | 931 | 82.9 |  |  |  |  |  |
| Color TV | No | 712 | 78.4 | 946 | 84.2 | 11.36 | 0.001 | 1.2 | 1.07 | 1.35 |
| Yes | 196 | 21.6 | 177 | 15.8 |  |  |  |  |  |
| Computer | No | 21 | 2.3 | 36 | 3.2 | 1.46 | 0.2 |  |  |  |
| Yes | 887 | 97.7 | 1087 | 96.8 |  |  |  |  |  |

**Supplementary Table 3.** Quality of Life Associated with Physical and Nutritional Conditions

|  | | Low quality of life | | High quality of life | |  |  |  |  |  |
| --- | --- | --- | --- | --- | --- | --- | --- | --- | --- | --- |
|  |  | *n* | % | *n* | % | x2 | *P* | OR | 5% CI | 95% CI |
| Calf circumference | <31 cm | 248 | 27.3 | 223 | 19.9 | 15.7 | 0.001 | 1.5 | 1.2 | 1.87 |
| >31 cm | 660 | 72.3 | 900 | 80.1 |  |  |  |  |  |
| Hand grip strength (kg) | Loss of strength | 787 | 86.7 | 865 | 77.1 | 30.4 | 0.0001 | 1.93 | 1.5 | 2.4 |
| Conserved strength | 121 | 13.3 | 257 | 22.9 |  |  |  |  |  |
| Basic activities of daily living | Dependent | 676 | 74.4 | 915 | 81.5 | 14.6 | 0.001 | 0.6 | 0.5 | 0.8 |
| Independent | 232 | 25.6 | 208 | 18.5 |  |  |  |  |  |
| Instrumental activities of daily living | Dependent | 762 | 83.9 | 745 | 66.3 | 81 | 0.0001 | 2.64 | 2.1 | 3.28 |
| Independent | 146 | 16.1 | 378 | 33.7 |  |  |  |  |  |
| Malnutrition indicator | Present | 859 | 94.6 | 913 | 81.3 | 79.8 | 0.0001 | 4.03 | 2.9 | 5.57 |
| Absent | 49 | 5.4 | 210 | 18.7 |  |  |  |  |  |
| Central obesity | Present | 191 | 21 | 181 | 16.1 | 8.1 | 0.004 | 1.38 | 1.1 | 1.7 |
| Absent | 717 | 79 | 942 | 83.9 |  |  |  |  |  |
| Food safety | Food insecurity | 666 | 73.3 | 669 | 59.6 | 41.9 | 0.0001 | 1.86 | 1.52 | 2.25 |
| Food safety | 242 | 26.7 | 453 | 40.4 |  |  |  |  |  |
| Consumption of sugary drinks | Daily | 515 | 56.7 | 306 | 27.2 | 179.5 | 0.001 | 3.47 | 2.88 | 4.1 |
| No consumption | 396 | 43.3 | 818 | 72.8 |  |  |  |  |  |

**Supplementary Table 4.** Factors Associated with the Quality of Life in Older Adults

| Regressors | F(8,2023) | R2 | B | SE | *P* |
| --- | --- | --- | --- | --- | --- |
| Model 1 | 81.8 | 0.33 | 48.49 | 2.4 | 0.001 |
| Food safety | -0.404 | 0.59 | 0.001 |
| Nutritional status | 1.15 | 0.78 | 0.001 |
| Ability to perform instrumental activities of daily living | 0.916 | 0.11 | 0.001 |
| Ability to perform basic activities of daily living | 1.91 | 0.48 | 0.001 |
| Hand grip strength (kg) | 0.09 | 0.03 | 0.002 |
| Waist circumference (cm) | -0.05 | 0.018 | 0.002 |
| Monthly income | 0.001 | 0.01 | 0.001 |
| Economic situation | 2.92 | 0.56 | 0.001 |

SE: standard error.
